# Supplementary material
Source: Elsevier journal article supplement (https://publikationen.ub.uni-frankfurt.de/files/44205/mmc1.zip)
Supplement: mmc1 [file mmc1.zip]

Archive with 1 entries (1 files):
- gdt00111-mmc1.R
